# Supplementary figures and images for: Superparamagnetic γ-Fe2O3 nanoparticles with tailored functionality for protein separation
Source: Royal Society of Chemistry journal article supplement (doi:10.1039/b707978h), 2007-01-01

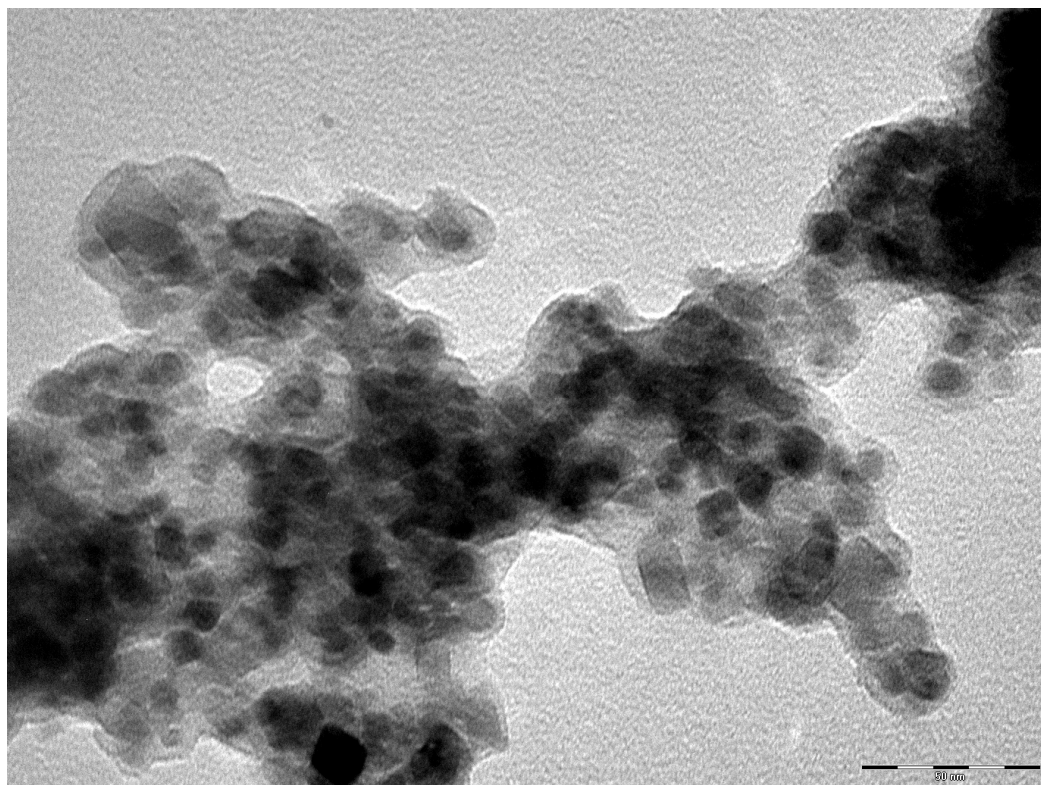

TEM images of the  $\gamma$ -Fe<sub>2</sub>O<sub>3</sub> nanoparticles after polymer functionalization.

Supplement: b707978h.pdf [file b707978h.pdf]
